## Expression of intermediate filament proteins during development of *Xenopus laevis*.

### II. Identification and molecular characterization of desmin

HARALD HERRMANN, BERNADETTE FOUQUET and WERNER W. FRANKE

*Institute of Cell and Tumor Biology, German Cancer Research Center, Im Neuenheimer Feld 280, D-6900 Heidelberg, Federal Republic of Germany*

#### Summary

During embryogenesis of avian and mammalian species the formation of intermediate filaments (IFs) containing desmin is characteristic for myogenesis. In view of important differences of patterns of IF protein expression in embryogenic pathways of amphibia on the one hand and birds and mammals on the other, we have decided to study the expression of desmin during early embryogenesis of *Xenopus laevis* by cDNA hybridization and antibody reactions. Here we describe the isolation of a cDNA clone encoding *Xenopus* desmin and the deduced amino acid sequence (458 residues;  $M_r$  52 800) which displays a very high degree of conservation during vertebrate evolution from *Xenopus* to chicken and hamster, with a similar degree of sequence divergence between all three species compared. In addition, we have noted, by both cDNA-hybrid-selection–translation and immunoblotting of cytoskeletal proteins a second des-

min-related polypeptide of  $M_r \sim 49\,000$ . RNA (Northern) blot analyses show the occurrence of three different desmin mRNAs (1.9, 2.6 and 3.0 kb) which seem to represent different polyadenylation sites, displaying quantitative differences in different kinds of muscle tissues. During embryogenesis, desmin mRNA has first been detected in stage-14 embryos and then increases drastically to high levels at stage 18 and thereafter. Immunofluorescence microscopy using desmin-specific antibodies shows that this synthesis of desmin is restricted to somite tissue. The embryonic time course of synthesis of desmin and desmin mRNA is discussed in relation to those of other muscle proteins.

Key words: *Xenopus laevis*, oocytes, cytoskeleton, intermediate filaments, desmin, somites.

#### Introduction

Of the various IF proteins that are differentially synthesized during embryogenesis, desmin has been shown to be typical for myogenesis, i.e. the formation of the cross-striated muscle tissue of myocardium and skeletal muscles and of the various kinds of smooth muscles (Cooke, 1976; Lazarides & Hubbard, 1976; Small & Sobieszek, 1977; Bennett *et al.* 1978, 1979; Lazarides *et al.* 1982). Desmin has also been found in the dispersed 'myoid cells' of the thymus (Henry, 1968; Hayward, 1972; Wekerle *et al.* 1975; Engel *et al.* 1977; Kao & Drachman, 1977; Drenckhahn *et al.* 1979; Dardenne *et al.* 1987; Kirchner *et al.* 1988) and the testis (Virtanen *et al.* 1986), in certain endothelial cells and pericytes (Fujimoto & Singer, 1986; Stamenkovic *et al.* 1986), stellate cells of liver of some species (Burt *et al.* 1986; Mijazaki *et al.* 1986), in cells of the interfollicular reticulum of lymph nodes and other lymphoid organs (Franke & Moll, 1987; Toccanier-Pelte *et al.* 1987) and in certain tumours, including myosarcomas as well as

tumours not commonly regarded as myogenic (Osborn & Weber, 1983; Denk *et al.* 1983; Altmannsberger *et al.* 1985; Ellis *et al.* 1985; Gatter *et al.* 1986; Leader *et al.* 1987; Brown *et al.* 1987; Norton *et al.* 1987).

During myogenesis, the proportion of vimentin originally predominant in the muscle precursor cells appears to decrease gradually, whereas desmin increases, in some kinds of muscle to the extent that vimentin is no longer detectable (Bennett *et al.* 1979; Granger & Lazarides, 1979; Lazarides *et al.* 1982; Osborn *et al.* 1982). Clearly, vimentin and desmin can copolymerize and form heterotypic IFs in certain muscle tissues and cell culture lines (Steinert *et al.* 1981; Quinlan & Franke, 1982). However, desmin can also be coexpressed with cytokeratins such as in fetal myocardium of human and chicken, in myoid cells of bovine testis, and in some smooth muscle cells, notably in fetal tissues (Longo *et al.* 1987; Huitfeldt & Brandtzaeg, 1985; Brown *et al.* 1987; Jahn *et al.* 1987; van Muijen *et al.* 1987; Kasper *et al.* 1988; Kuruc & Franke, 1988).

During early mammalian and avian embryogenesis,

IFs containing desmin have not been detected (e.g. Jackson *et al.* 1980, 1981; Tapscott *et al.* 1981; Bignami & Dahl, 1984; Erickson *et al.* 1987), and its advent appears to be correlated with the synthesis of other myogenic marker proteins (e.g. Fuseler *et al.* 1981; Lazarides *et al.* 1982; Whalen *et al.* 1982; Danto & Fishman, 1984; Fishman & Danto, 1984; Hayward & Schwartz, 1986; Mahdavi *et al.* 1986; Robert *et al.* 1986). For early amphibian embryogenesis, in which the expression pattern of IF proteins is different in that most, if not all, cells contain cytokeratins (Franz *et al.* 1983; Godsave *et al.* 1984, 1986; Wylie *et al.* 1986; Herrmann *et al.* 1989), it has been reported that several typical muscle proteins, including  $\alpha$ -actins, are first synthesized after gastrulation and are specifically induced in the forming muscle tissue (Sturgess *et al.* 1980; Gurdon *et al.* 1984; Mohun *et al.* 1984; Wilson *et al.* 1986; Mohun & Garrett, 1987; for a recent review, see Gurdon, 1987). However, the myogenic IF protein, desmin, has not yet been included in studies of amphibian embryogenesis. Therefore, we have isolated and characterized a desmin cDNA clone from an embryonic library and have used it, in combination with desmin-specific monoclonal antibodies, to identify the time and location of desmin synthesis in amphibian development.

## Materials and methods

Maintenance of animals, cloning and sequencing procedures as well as RNA preparations and RNA blot experiments were performed as described in Herrmann *et al.* (1989). The radioactive probe for Northern blot analyses was constructed from a *Bam*HI/*Hind*III-restricted, 670 nucleotides long 5'-end-fragment of pXenDes1 (containing 25 nucleotides of polylinker), using the random prime labelling kit from Boehringer (Mannheim, FRG). It was applied at  $1.2 \times 10^6$  cts min ml<sup>-1</sup> hybridization solution.

For preparation of cytoskeletal proteins from the muscular layer of *Xenopus* oesophagus, 20  $\mu$ m thick cryostat sections of oesophagus from adult animals were microdissected and extracted with buffers containing 1.5 M-salt and 1% Triton X-100 (Herrmann *et al.* 1989). Stage-18 embryos were extracted accordingly, and aliquots of high-salt-resistant fractions ('cytoskeletal proteins') equivalent to 50 embryos were loaded in each isoelectric focusing separation in two-dimensional gel electrophoresis.

Immunoblotting and immunofluorescence microscopy were performed as described (Herrmann *et al.* 1989), using a monoclonal antibody specific for desmin (Debus *et al.* 1983; from Boehringer, Mannheim, FRG).

## Results

### (A) Characterization of desmin cDNAs

In the course of screening an embryonic cDNA library for *Xenopus* vimentin we isolated two clones with insert sizes of about 3 kb that gave identical restriction maps which, on the other hand, were completely different from those obtained with the *Xenopus* vimentin clones. When one of these clones was used in hybrid-selection experiments with total RNA from *Xenopus* stage-18

embryos, mRNA was isolated that gave rise, after translation *in vitro* and two-dimensional gel electrophoresis, to two polypeptides of  $M_r \sim 53\,000$  and  $\sim 49\,000$ , respectively, the larger of which was more basic than the smaller one (Fig. 1A,B). Both radioactive polypeptides comigrated with the most basic component of two prominent series of spots of cytoskeletal proteins from the smooth muscle layer of *Xenopus* oesophagus (Fig. 1A,B) identified as desmin-related by their specific reaction with a monoclonal desmin antibody (Fig. 1C). A cytoskeletal fraction from stage-18 embryos (Fig. 1D) revealed upon immunoblotting with a monoclonal desmin antibody two spots which corresponded to the two products of the hybrid-selection experiments (arrows in Fig. 1E). These results indicated that the isolated clone encoded desmin, and therefore we designated the clone pXenDes1. The  $M_r \sim 49\,000$  component is clearly a desmin-related polypeptide, but its chemical relationship to the  $M_r 53\,000$  polypeptide requires further clarification.

In Northern blot analyses of heart muscle RNA this clone reacted with two mRNA bands of  $\sim 3.0$  and 1.9 kb (Fig. 2, lane 1). With skeletal muscle RNA we noticed the same two bands but, in addition, another band of  $\sim 2.6$  kb (Fig. 2, lane 2). In RNA samples from ovary (lane 3) and cultured XLKE-A6 cells (lane 4) no signals were detected.

### (B) Nucleotide sequence and deduced amino acid sequence of desmin

The sequence of the desmin clone, pXenDes1, is presented in Fig. 3. It contains 2995 bp and the second ATG is found within the consensus sequence ACCATG Pu (Kozak, 1986). The 116 bp 5'-untranslated region is followed by an open reading frame of 1374 bp coding for 458 amino acids which corresponds to a calculated molecular weight of 52 799, including the initial methionine that is probably lost post-translationally. This value is slightly lower than that given for hamster desmin (cf. Quax *et al.* 1985) which contains 468 amino acids, corresponding to a molecular weight of 53 308. The TAA stop codon introduces a 1505 bp 3'-untranslated region that contains three possible polyadenylation sites at positions 1754, 2114 and 2905. Whether these poly(A) addition sites correspond to the mRNA bands of 1.9, 2.6 and 3.0 kb in RNA blot experiments of cardiac and skeletal muscle (Fig. 2) or whether there are further downstream polyadenylation sites remains to be examined.

Comparison of the amino acid sequence deduced from pXenDes1 with those of chicken and hamster desmin showed a close relationship (Fig. 4). The amino acids in the  $\alpha$ -helical rod show 83% identical positions (270 out of 326) in all three species, most of the differing positions being conservative exchanges. Remarkably, this homology extends to the tail region, which displays 77% (*Xenopus*/chick) and 85% (*Xenopus*/hamster) identical amino acids. In direct contrast, the head region is, apart from the highly conserved first 20 amino acids, more variable in size and in sequence (58 and 65% identical amino acids with respect to hamster and

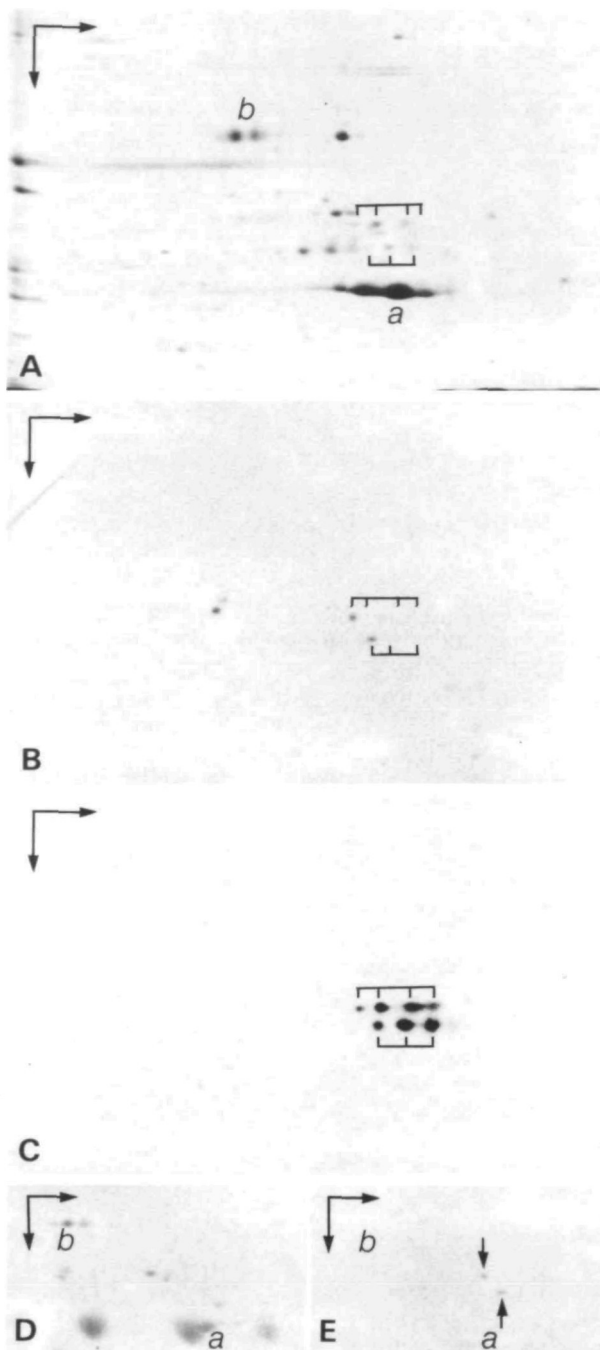

**Fig. 1.** Identification of the polypeptide encoded by the cDNA clone pXenDes1, using *in vitro* translation of mRNA selected from stage-18 embryo RNA and two-dimensional coelectrophoresis of the radioactively labelled translation products with cytoskeletal proteins from the muscular layer of *Xenopus* oesophagus (horizontal arrow, IEF; vertical arrow; SDS-PAGE). (A) Coomassie-brilliant-blue-stained gel loaded with cytoskeletal proteins from the muscular layer of oesophagus. (B) Autoradiograph of the gel shown in A, revealing [<sup>35</sup>S]methionine-labelled products of *in vitro* translation of mRNA selected by hybridization with clone pXenDes1. (C) Immunoblot detection of desmin in a parallel gel electrophoresis, using monoclonal antibody to desmin. (D) Ponceau-S-stained nitrocellulose replica from gels loaded with cytoskeletal proteins from stage-18 embryos. (E) Immunoblot detection of desmin using monoclonal antibody to desmin. Arrows indicate the reactive polypeptides. Bars in A and B designate positions of immunoreactive desmin polypeptides as identified from the immunoblot in C. The second series of spots of lower  $M_r$  in B are either the corresponding proteolytic breakdown products or represent a genuine desmin-related polypeptide; in A and C additional, more acidic desmin variants are evident, compared to the components seen in the translational assay (B) and in the immunoblot of the cytoskeletal fraction of stage-18 embryos (E). *a*, Actin; *b*, bovine serum albumin.

ine in vimentin, and threonine in desmin; Fig. 5). Following this consensus sequence, a PSFS sequence is conserved in desmin of *Xenopus* and hamster, and a similar motif is seen in the corresponding position of chicken desmin. In desmin, the number and the se-

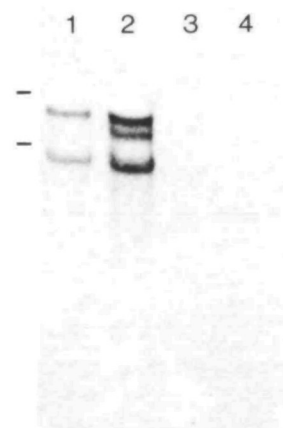

**Fig. 2.** RNA blot analysis of gel electrophoretically separated desmin mRNAs from various *Xenopus* tissues. Lane 1, cardiac muscle; lane 2, skeletal muscle; lane 3, ovarian tissue; lane 4, XLKE-A6 cells. 10  $\mu$ g of total RNA were loaded and hybridized with a random-primed <sup>32</sup>P-labelled probe of pXenDes1. Bars indicate positions of 28S and 18S *Xenopus* rDNAs. Note the presence of two (in lane 1) and three (in lane 2) major mRNAs of different sizes.

chicken). Interestingly, however, the three possible phosphorylation sites of the protein kinase A type RXS reported for chicken desmin (cf. Geisler & Weber, 1988) are also present in *Xenopus* desmin (positions 40, 47 and 62; the second site is modified in the *Xenopus* sequence to KGAS, and to KGS in hamster desmin).

Sequence comparison of vimentin and desmin in the three species shows that the  $\alpha$ -helical rod and the tail are very similar in the two IF proteins, whereas the head region seems to tolerate a higher degree of variability. Therefore, it is especially notable that in both vimentin and desmin the head contains shortly after the initial methionine, a highly conserved non-peptide SSYRRXFGG (X being isoleucine or methion-

quence of amino acids preceding this consensus sequence is also well conserved. Moreover, at position 10 of desmin, an arginine is found which introduces a possible phosphorylation site (RXS) for protein kinase A that is not present in vimentin. This conserved sequence motif is also seen as TSYRRTFGP, in the 'c73 IF protein' (Leonard *et al.* 1988), a recently detected rat IF protein expressed in a particular subset of mammalian neuronal cells ('peripherin'; Portier *et al.* 1984) that is highly homologous to desmin in the  $\alpha$ -helical rod domain but shows little relationship to desmin in the head domain.

(C) Expression of desmin during embryogenesis

Using RNA blot analysis (Northern blots) we detected desmin mRNAs first in stage-14 embryos (Fig. 6, lane 5) whereas in stage 11 no signal was observed (Fig. 6, lane 4). Remarkably, all three mRNA species observed in skeletal muscle were identified in all these embryonic stages (Fig. 6, lanes 5-9) although their relative amounts varied considerably: in stage 28 the signal at ~1.9 kb was highest, compared to the ~2.6 and ~3.0 kb bands (Fig. 6, lane 7). The intensity of the reaction at

~3.0 kb increased over that at ~2.6 kb in swimming tadpoles (stages 42; Fig. 6, lane 9).

(D) Localization of desmin in adult tissues and early embryonal stages

By immunofluorescence microscopy on frozen sections of several tissues of adult *Xenopus laevis* with a monoclonal desmin-specific antibody, we observed positive reactions in smooth muscle tissue of the intestine and the oesophagus, in cardiac and skeletal muscle (where the fluorescence was concentrated in the Z-bands) as well as in cells of the endothelium (data not shown). When embryonic stages were examined by immunofluorescence microscopy on cryostat sections of frozen embryos, intense immunostaining was seen in early somite tissue of stages 14 (data not shown) and 18 (Fig. 7).

In parallel sections and double label experiments, the same somite regions were also positively stained with cytokeratin antibodies, including monoclonal antibody lu-5 (data not shown; see also figs 9 and 10 of Herrmann *et al.* 1989), indicative of the coexpression of cytokeratin and desmin IFs in the somite cells.

```

1 AAAGGGTTGGTTATATGTAACGTGCTTTTCCACTTTTTTTTTTTTTATTTTTACCACAAACTTCTTGCCACTTCATCCCACCTGAGCCAAACATCAAG
101 GCTCCCAGCAGCAACCATGAGCCAGTCTTATCAAGCAACAGAGGGCTTCCTCCTACCGCCGCACTTTGGAGGGGGTCCCCATCATTGAGCACTAGG
1 M S Q S Y S S N Q R A S S Y R R T F G G G S P S F S T R
201 TCCTCCTTTGGTCTAAAGTGCTTCTCTAGTTCAGTGCTTCCAGAGTATACCAAGTTCCAGATCTACAGCGGCCCAAGCCTCCAGTTTTAGAG
28 S S F G S K G A S S S S V S S R V Y Q V S R S T A A P S L S S F R
301 CAACAAGGGTCGCCCAAGTAAGAAGCAGCTATGGAGCAGATGTTTTGGACTTCAGTCTTCAGATGCAATGAACAGGAGTTCCTGCAAACCCGAACCAA
82 A T R V A P V R S S Y G A D V L D F S L A D A M N Q E F L Q T R T N
401 TGAAAGGTGGAGTGCAGGATTTGAACGACAGGTTGCCAACTATATTGAGAAGGTCCGGTACCTTGAGCAGCAGAATCAGATTCCTGTGGCAAGGTC
98 E K K V L E Q D L N D R F A N Y I E K V R Y L E Q Q N Q I L V A E V
501 AACAGACTAAAGGGAAGAGGCCACCAGGGTGAACGAGCTGTATGAGGAAGAGATGAGGGAGCTCGCCGTCGAAGTGGACCTTGTGACCAATCAGAGGG
129 N R L K G K E P T R V N E L Y E E E M R E L R R Q V D L V T N Q R
801 CACGTGTGGAGTAGAAGGGACAACCTGGTAGATGACCTTCAAAGCTTAAGCAGAGGTTGCAGGAGGAGATCCAGTTGAAGGAAGATGCTGAGAACA
182 A R V E V E R D N L V D L Q K L K Q R L Q E E I Q L K E D A E N N
701 TCTTGCCTGTTTCAGAGGGATGTTGATGCTGCTACTTCGGCCCGCATAGACCTGAGAGAGAGCATGAGTCTTTGCAAGGAGAAATGGATTCCTGAAA
198 L A A F R G D V D A A T L A R I D L E R R I E S L Q E E I A F L K
801 AAGATTTCATGAGGAGAAATCCGGGAACCTGCAAGGACAGTTCCAAAGCAACAGCTGCAAGTGGAGATAGATGTTCCAAACAGACCTGACAGCAGCAC
229 K I H E E E I R E L Q A Q F Q E Q Q L Q V E I D V S K P O L T A A
901 TCAGAGATTCGCCGGCTCAGTACGAGAACATGCCCACCAAGAATGTTGCTGAAGCCGAGGAGTGGTCAAGTCCAAGGTCAGTGACCTCAACCAGGCAGC
282 L R D I R A Q Y E N I A K N V A E A E E W Y K S K V S D L N Q A A
1001 TAAGAAGAACAATGATGCCATGCGCCAGTCCAAGCAGAGATGATGGAGTACCGCCACCAATCCAGTCTACACCTGCGAGATTGATGCACTTAAGGGA
298 K K N N D A M R Q S K Q E M M E Y R H Q I Q S Y T C E I D A L K G
1101 ACAAAATGACTCCTTGATGCGCCAGATGAGGACCTAGAGGAAAAGTTTTCTGGGAAGCTGCTGGGTACCAGGACACCATTTGAGGAGAAAGAGA
329 T N D S L M R Q M R D L E E K F S G E A A G Y Q D T I G R L E E E
1201 TCCGTAATATGAAAGATGAAATGGCAAGGCATCCCGCAGATACAGGATCTTCTGAACGTTAAGATGGCACTGACATGAAATGGCCATACCCGTTA
362 I R N M K L E N Y Q D L R N V K M A L E D M E I A T Y R K
1301 ACTGCTAGAGGGCAGGAAAGCAGGATCACTCTTCCCATCCAAACATTTTCTGCACTCAGTTTTAGAGAAAACAGCCAGAGCAGAGGGCTTCGGAAGTT
398 L L E G E E S R I T L P I Q T F S A L S F R E T S P E Q R A S E V
1401 CACACAAGAAAACAGTCATGATCAAGCAGATGAGCAGGAGGATGGTGAAGTTTTGAGTGAAGCTTCCAGCAGCACCAGGAGATTTGTAAACTGCCA
429 H T K K T I E T R D G E V L S E A S Q H Q E I L *
1501 TCATGTCTCTTGACCGTGGGCATGCAACAGGAAAAAGATTACCCACAATTCACAGCCTGAGGACAACCCAGCTGGACAATGGCAACTCATGCTGTAC
1601 CTTACCACATACCGCTGACACCTACACTTGTCCCTGATCTCTAAGGACCCAGTACCTGAGCTCATATGGAGCTGCTCAGCATATGAACACTCCT
1701 GCTAAGAGGATCCATGTTGGGAATGCTCAGCAGTAAACAGAGAAACCCAGAAATGAAATCAGCTCACAAGTCTTTTCAGTTCCCATTCATCTCTTA
1801 GATATGCTCTAATGAAAAATGTAATATGTATCTGTAGCATTAAATGTACAAATAGCAGTGTATCTCCCTGCAAAAACATACCTTGCCAGATAAATTAAT
1901 ATTAATATATCCCCTACCTCATCCATAGAAATCCATGCTCTTTAATGTCCTTAGATGGGTGTCACAAATATCCAGCCCCAACAATAATCATGCGCTGG
2001 ACAACCTCTGACTCTACCAAACTATTTGGACTGCAACTCTCAGCTCTGACATGAGTAAAAGTTACTGGACCTGACAGCAAAATTCGTTATAGGGCTCGATA
2101 TACCAAGGATAAAATAATTTGCACATTTGGTATGAGACTTCACTGGGCCCTTACATTCACCATACAGCAAAAGGGTCTGCTTCCCATATTTTTATGGCC
2201 CCGACTCCAGTAAATATCATCTACAAGGCTGTAGACTGTATGGAAGTACAGGCTGCTCTTCTTCTGCTAAAGCCTTTAAATATATCAGATCAGGTAA
2301 AAGTAAATTCAGTCTCAGAGGCTTATGGGAAGTGTTCATAAAGAGCTGAAGTAAACAGAGGTTGCTGAAATAGGCACAAATGTCTATCAAGCCCTCTT
2401 CACTAGTTTCTATTACTAGAGATGCTTTCAGTAAATCCATAGGAAGCCCAATAGCCCAACAAGTGAATTTATGATCCTCCCAAGATGCACTTCTC
2501 ACTAAGGGTATGTGAAATCTGTGGAAGTATATATAGTGTGATAATTTTCAGGAAAACAGCTCAAGGCAAAAAAAAAAAAAAAAAAAGTGGAAAAAGC
2801 ACGTTACATATAACAAGATAAAGGGATAATGTTAACGAAAACACACACAGGGTGGATCCGATGGGAGACAAGGGTTGGTTATGTATCTGCAGCT
2701 TGGAACATGCATAGAATCTTATTTGTTTGTCTTTTATAGGAATTTTGGATATGTTAATCTGATAAG-GGGAAAGAAAAAGGCCATGGTTCAA
2801 TAACCTGCAAGCACAATCCCATTAATTCATAGCCAGTGGGAGATACAGCAGTGCACAATATATCTATCAGATCAGATTTCTATTTTAGAAGCTCTG
2901 CGAAAAAAGGTTTCTCCTTGAATCCACAAACTGTTGTTTAAATGCTGATTCACCTAGTGGTCTTTTTTAACTTTTATTCACAATCTATAGT

```

Fig. 3. Nucleotide sequence of clone pXenDes1 and deduced amino acid sequence of *Xenopus laevis* desmin. Asterisk denotes stop codon. Three putative polyadenylation signals are marked by bars.

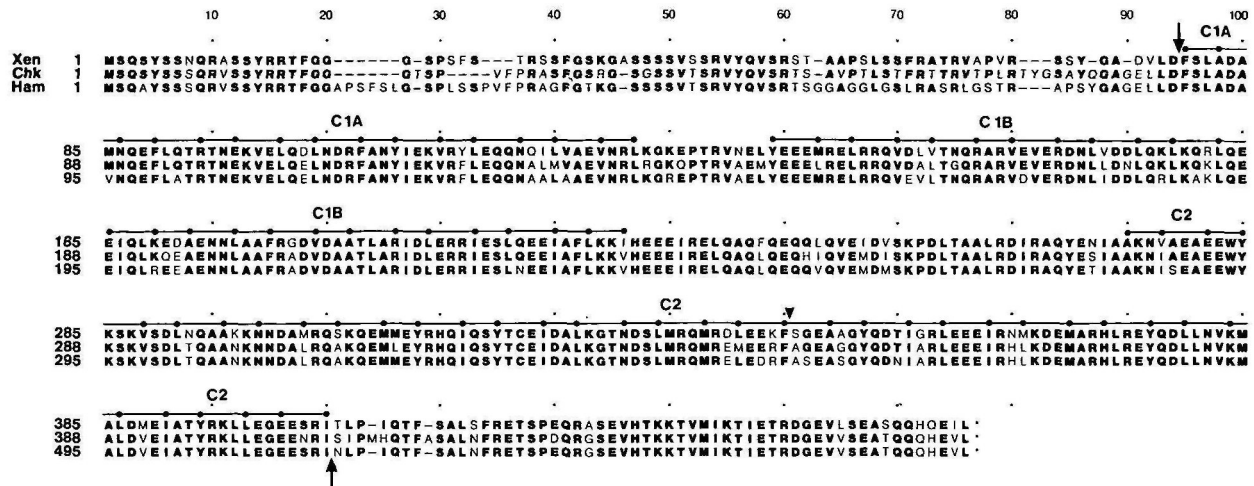

Fig. 4. Amino acid sequence comparison of *Xenopus* desmin (Xen), chicken desmin (Chk; taken from Geisler & Weber, 1984) and hamster desmin (Ham; taken from Quax *et al.* 1985). Bold-faced letters denote amino acids identical in *Xenopus* desmin and in at least one of the other two species. Amino acid sequences have been aligned for maximal homology; insertions introduced for this purpose are denoted by horizontal bars. The downward arrow demarcates the start and the upward arrow the end of the  $\alpha$ -helical rod domain. The dots represent positions a and d of the heptade convention to maximize coiled-coil configuration. The rod-domain contains two non- $\alpha$ -helical interruptions of 11 and 43 amino acids, respectively, giving rise to coiled-coil subdomains 1A (C1A), 1B (C1B) and 2 (C2). The arrowhead indicates an alteration in the heptade pattern that probably results in a 'stutter' in coil 2.

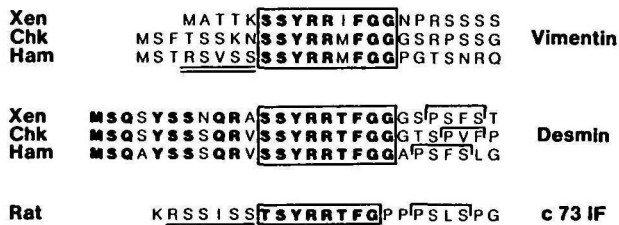

Fig. 5. Highly conserved sequence feature found near the N-terminus of the head domains of vimentin, desmin and neurone-specific IF protein c73IF. Vimentin and desmin from *Xenopus* (Xen), chicken (Chk) and hamster (Ham) and rat c73IF protein (taken from Leonard *et al.* 1988) are aligned with respect to the conserved nonapeptide consensus sequence (SSYRRXFGG). Bold-faced letters designate identical amino acids in all three proteins, including a conservative serine to threonine exchange in c73IF. In hamster vimentin and rat protein c73IF, a similar sequence precedes the nonapeptide (underlined). The motif PSFS present in *Xenopus* and hamster desmin appears in a modified form in protein c73IF as well as in chicken desmin (overlined). Note that in the desmins the sequence preceding the nonapeptide is also very similar.

## Discussion

The cDNA clone pXenDes1 encoding *Xenopus laevis* desmin extends our knowledge about this IF protein to amphibia and represents a valuable probe for studies of myogenesis and the regulation of expression of muscle-specific cytoskeletal proteins. Comparison of the deduced amino acid sequence with the sequences of avian (chicken) and mammalian (hamster, pig) desmin shows

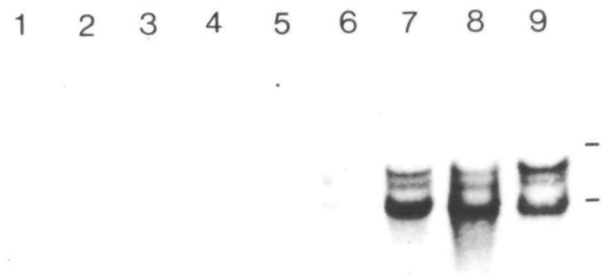

Fig. 6. RNA blot analysis of gel electrophoretically separated RNAs from various stages of *Xenopus laevis* development. Total RNA was prepared from embryos of the specific embryonal stage, and 20  $\mu$ g each were loaded per slot for formaldehyde/agarose gel electrophoresis. Blotted RNA was hybridized with a random-primed,  $^{32}$ P-labelled probe of pXenDes1. Lane 1, unfertilized eggs; lane 2, stage 6.5 (morula); lane 3, stage 9 (fine cell blastula); lane 4, stage 11 (gastrula); lane 5, stage 14 (neural plate stage); lane 6, stage 18 (neural groove stage); lane 7, stage 28; lane 8, stage 39; lane 9, stage 42 (swimming tadpole). Bars indicate positions of *Xenopus* 28S and 18S rRNA. Note that first reaction is seen in stage 14 (lane 5).

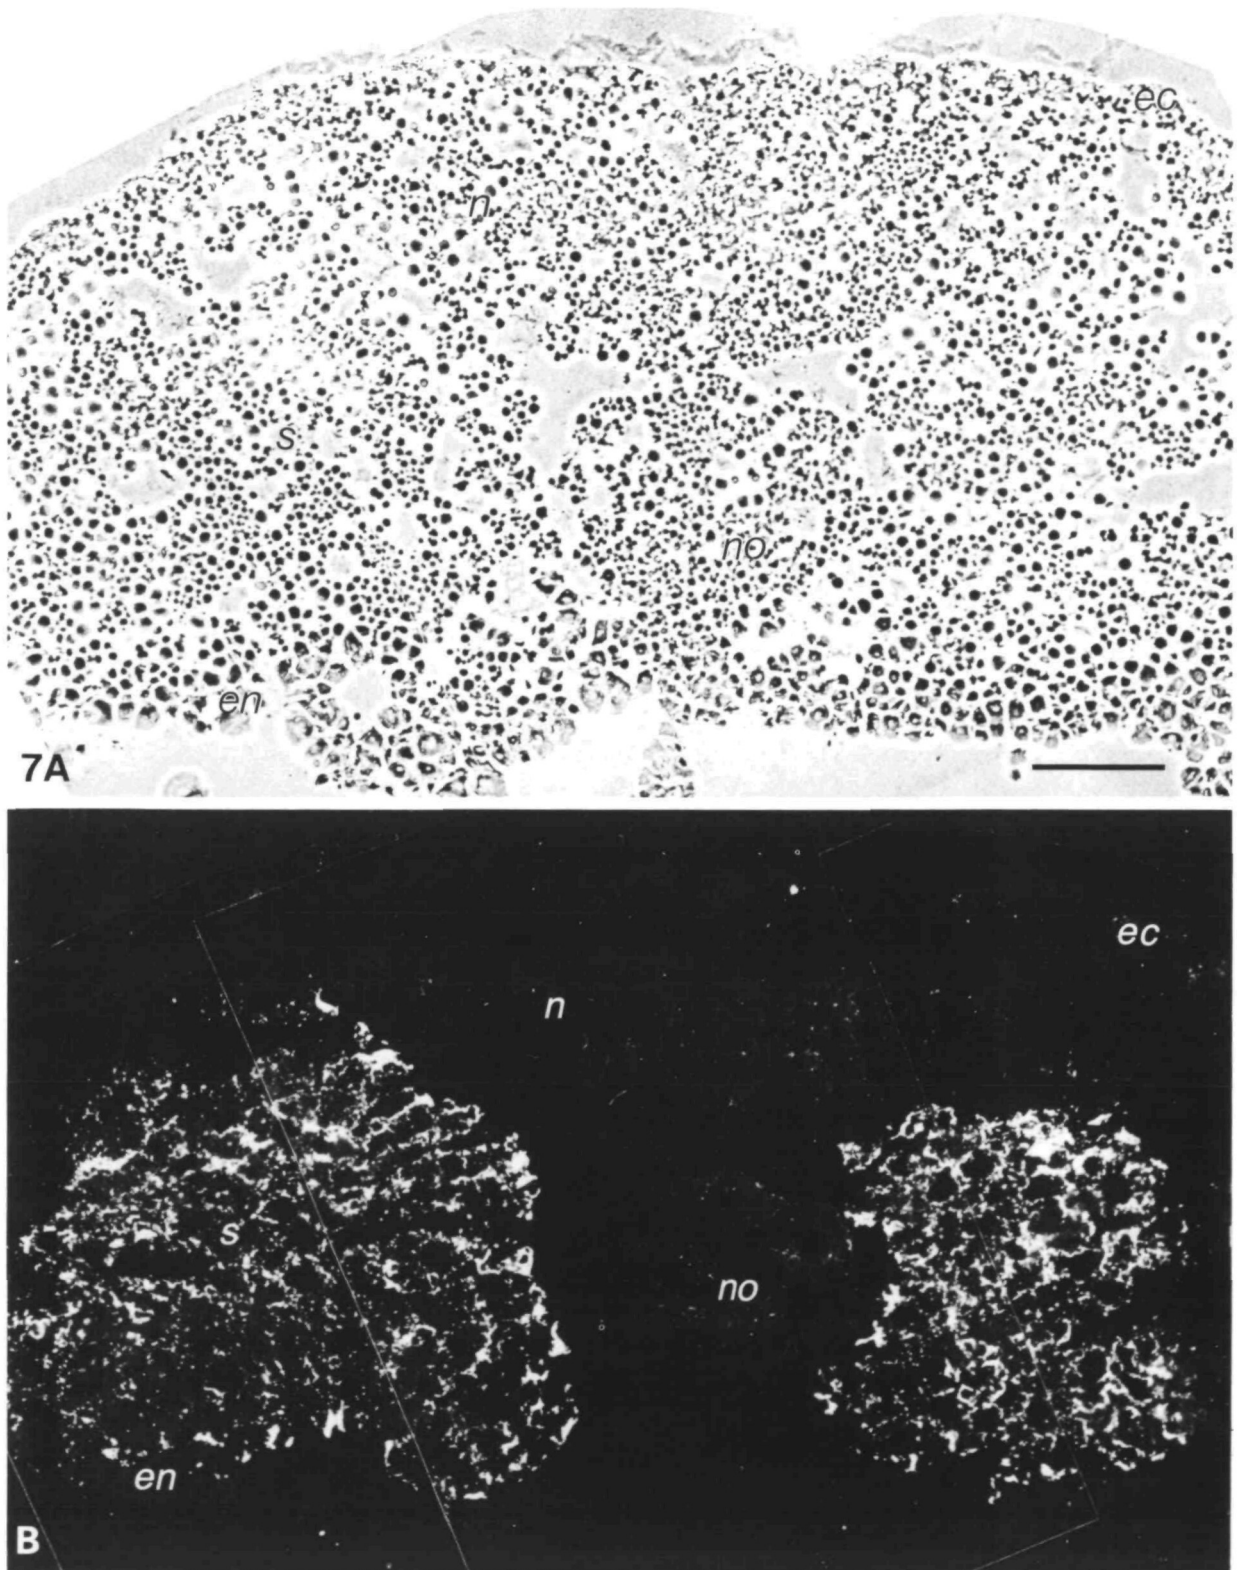

Fig. 7. Immunofluorescence microscopy performed on cryostat sections of snap-frozen stage-18 embryos of *Xenopus laevis* using a monoclonal desmin antibody. (A,B) The same field is shown in epifluorescence (A) and phase-contrast (B) optics. The somites are brightly stained, all other cell layers are negative. *ec*, ectoderm; *en*, endoderm; *n*, neural groove; *no*, notochord; *s*, somite. Bar, 50  $\mu$ m.

that desmin has been well conserved during vertebrate evolution (more than 81% identical residues in *Xenopus* and hamster desmin). Despite the considerable general sequence homology between desmin and vimentin (for other species see Geisler & Weber, 1981; Weber & Geisler, 1984; Quax *et al.* 1985), which in *Xenopus* amounts to 71.3% identical amino acid residues in the rod portion, it has to be stated that the difference between desmin and vimentin is as great in the amphibian (182 amino acid exchanges) as in the avian (182 different residues) and mammalian (176 exchanges) species. This indicates that the separation of these two IF proteins, which probably are derived from a common ancestral gene (Franke *et al.* 1978; Quax *et al.* 1983, 1985), has occurred long before the evolution of the anuran amphibia, in agreement with previous data of Quax *et al.* (1984). Particularly noteworthy is the maintenance of certain common sequence features in the rod and tail domains of both proteins in otherwise more divergent regions, including a SSYRRXFGG motif near the aminoterminal that may represent important functional sites or signals.

In alignments of the vimentin and desmin sequences of *Xenopus*, chicken and hamster, we have noted several evolutionarily conserved features that provide distinguishing characteristics for vimentin and desmin, respectively. (i) The head domains of both proteins carry five or more possible kinase A type phosphorylation sites which, however, are arranged in patterns differing in the specific proteins. It will have to be seen whether these sites are indeed involved in regulations of the assembly of the specific IFs formed as it has been proposed by Geisler & Weber (1988; for vimentin see also Inagaki *et al.* 1987; 1988). (ii) Besides the nonapeptide common to the heads of both vimentin and desmin, the number and the kind of amino acids preceding this nonapeptide are also conserved in desmin but not in the two major vimentins. (iii) In the highly conserved  $\alpha$ -helical rod, we have noticed a divergent site in coil 1B, which starts at position 196 of *Xenopus* vimentin Vim1 (LQSFQDQVDNA), which in desmin is replaced by LAFFADVDAA, resulting in different surface domains on the  $\alpha$ -helix (amides in vimentin, compared to hydrophobic residues in desmin). (iv) The carboxy-termini differ in that the vimentins show a very acidic tip, DDFE, compared to HEVL in the desmins.

Surprisingly, we have found two polypeptides reactive with both our desmin probes, i.e. by the monoclonal antibody and by cDNA-hybrid selection of mRNAs, followed by translation *in vitro*. While the larger ( $M_r \sim 53\,000$ ) and slightly more basic component appears to correspond to the  $M_r 52\,800$  polypeptide encoded by clone pXenDes1, the component with higher electrophoretic mobility, corresponding to  $M_r \sim 49\,000$ , might represent a different, perhaps truncated, form of desmin. A proteolytic derivative of the latter component, although not fully ruled out at present, appears less likely in view of our *in vitro* translation results. More direct analytical work is needed to answer this question.

At both the protein and the mRNA level, we have

not found desmin in appreciable amounts in oocytes, eggs or in early embryonic stages, including blastulae. With both the mRNA and protein probes, desmin has first been detected in a postgastrulation stage, i.e. stage 14, the neural plate stage. Probably, with greater sensitivity it might be possible to date the actual onset of synthesis of desmin mRNAs somewhat earlier. Obviously, these data and the demonstrated enriched, if not exclusive, occurrence of desmin in somite tissue correlate with the advent, in space and time, of several other muscle-specific proteins (e.g. Sturges *et al.* 1980; Gurdon *et al.* 1984, 1985a,b; Mohun *et al.* 1984; Gurdon & Fairman, 1986; Wilson *et al.* 1986; Kay *et al.* 1987; Mohun & Garrett, 1987). It will be interesting to find the regulatory elements that are responsible for the concerted expression of this 'myogenic program'.

In mammalian and avian embryogenesis, vimentin appears in mesenchymal cells before, and in a wider range of cells than, desmin, and the latter IF protein has been detected only in myogenic cells that initially contain vimentin as their only IF protein (e.g. Lazarides *et al.* 1982; Bignami & Dahl, 1984; Bennett *et al.* 1979). In *Xenopus* embryogenesis, however, we have so far not detected vimentin in the somites or presumptive somite cells, although at the same time this IF protein is easily demonstrable in certain adjacent mesenchymal cell layers (Herrmann *et al.* 1989). Our finding that, in *Xenopus*, the somites and the presumptive somite cells contain cytokeratin IFs, like practically all early embryonic cells, suggests that the expression of desmin and the formation of desmin filaments can begin in cytokeratin-synthesizing cells and is compatible with ongoing cytokeratin synthesis. This observation may seem surprising on first sight, but is in agreement with recent reports of the coexistence of cytokeratin and desmin IFs in certain adult smooth muscle tissues of *Xenopus* (Jahn *et al.* 1987) and human (Brown *et al.* 1987; Jahn *et al.* 1987; Norton *et al.* 1987; Kasper *et al.* 1988) as well as in chicken and human embryonic myocardium (Van Muijen *et al.* 1987; Kuruc & Franke, 1988). Apparently, there exist regulatory factors that permit the simultaneous synthesis of certain IF proteins in one kind of tissue but lead to a mutually exclusive synthesis of the same IF proteins in other tissues.

We thank Monika Brettel and Ralf Zimbelmann for expert technical assistance. The work has been supported in parts by the Deutsche Forschungsgemeinschaft.

## References

- ALTMANNBERGER, M., WEBER, K., DROSTE, R. & OSBORN, M. (1985). Desmin is a specific marker for rhabdomyosarcomas of human and rat origin. *Amer. J. Pathol.* **118**, 85–95.
- BENNETT, G. S., FELLINI, S. A., CROOP, J. M., OTTO, J. J., BRYAN, J. & HOLTZER, H. (1978). Differences among 100 Å filament subunits from different cell types. *Proc. natn. Acad. Sci. U.S.A.* **75**, 577–584.
- BENNETT, G. S., FELLINI, S. A., TOYAMA, Y. & HOLTZER, H. (1979). Redistribution of intermediate filament subunits during skeletal myogenesis and maturation *in vitro*. *J. Cell Biol.* **82**, 577–584.
- BIGNAMI, A. & DAHL, D. (1984). Early appearance of desmin, the

- muscle-type intermediate filament protein, in the rat embryo. *J. Histochem. Cytochem.* **32**, 473–476.
- BROWN, D. C., THEAKER, J. M., BANKS, P. M., GATTER, K. C. & MASON, D. Y. (1987). Cytokeratin expression in smooth muscle and smooth muscle tumours. *Histopathology* **11**, 477–486.
- BURT, A. D., ROBERTSON, J. L., HEIR, J. & MACSWEEN, R. N. M. (1986). Desmin-containing stellate cells in rat liver: distribution in normal animals and response to experimental acute liver injury. *J. Pathol.* **150**, 29–35.
- COOKE, P. (1976). A filamentous cytoskeleton in vertebrate smooth muscle fibers. *J. Cell Biol.* **68**, 539–1556.
- DANTO, S. I. & FISCHMAN, D. A. (1984). Immunocytochemical analysis of intermediate filaments in embryonic heart cells with monoclonal antibodies to desmin. *J. Cell Biol.* **98**, 2179–2191.
- DARDENNE, M., SAVINO, W. & BACH, J.-F. (1987). Thymomatous epithelial cells and skeletal muscle share a common epitope defined by a monoclonal antibody. *Am. J. Pathol.* **126**, 194–198.
- DEBUS, E., WEBER, K. & OSBORN, M. (1983). Monoclonal antibodies to desmin, the muscle-specific intermediate filament protein. *EMBO J.* **2**, 2305–2312.
- DENK, H., KREPLER, R., ARTLIEB, U., GABBIANI, G., RUNGGER-BRÄNDLE, E., LEONCINI, P. & FRANKE, W. W. (1983). Proteins of intermediate filaments. An immunohistochemical and biochemical approach to the classification of soft tissue tumors. *Amer. J. Pathol.* **110**, 193–208.
- DRENCKHAHN, D., VON GAUDECKER, B., MÜLLER-HERMELINK, H. K., UNSICKER, K. & GRÖSCHEL-STEWART, U. (1979). Myosin and actin containing cells in the human postnatal thymus. *Virchows Arch B (Cell Pathol.)* **32**, 33–45.
- ELLIS, G. L., LANGLOSS, J. M. & ENZINGER, K. F. M. (1985). Coexpression of keratin and desmin in a carcinosarcoma involving the maxillary alveolar ridge. *Oral Surg.* **60**, 410–416.
- ENGEL, W. K., TROTTER, J. L., MCFARLIN, D. E. & MCINTOSH, C. L. (1977). Thymic epithelial cell contains acetylcholine receptor. *Lancet*, June 18, 1310–1311.
- ERICKSON, C. A., TUCKER, R. P. & EDWARDS, B. F. (1987). Changes in the distribution of intermediate-filament types in Japanese quail embryos during morphogenesis. *Differentiation* **34**, 88–97.
- FISCHMAN, D. A. & DANTO, S. I. (1985). Monoclonal antibodies to desmin: Evidence for stage-dependent intermediate filament immunoreactivity during cardiac and skeletal muscle development. *Ann. N. Y. Acad. Sci.* **455**, 167–184.
- FRANKE, W. W. & MOLL, R. (1987). Cytoskeletal components of lymphoid organs. I. Synthesis of cytokeratins 8 and 18 and desmin in subpopulations of extrafollicular reticulum cells of human lymph nodes, tonsils, and spleen. *Differentiation* **36**, 145–163.
- FRANKE, W. W., SCHMID, E., OSBORN, M. & WEBER, K. (1978). Different intermediate-sized filaments as distinguished by immunofluorescence microscopy. *Proc. natn. Acad. Sci. U.S.A.* **75**, 5034–5038.
- FRANZ, J. K., GALL, L., WILLIAMS, M. A., PICHERAL, B. & FRANKE, W. W. (1983). Intermediate-size filaments in a germ cell: Expression of cytokeratins in oocytes and eggs of the frog *Xenopus*. *Proc. natn. Acad. Sci. U.S.A.* **80**, 6254–6258.
- FUJIMOTO, T. & SINGER, S. J. (1986). Immunocytochemical studies of endothelial cells in vivo. I. The presence of desmin only, or of desmin plus vimentin, or vimentin only, in the endothelial cells of different capillaries of the adult chicken. *J. Cell Biol.* **103**, 2775–2786.
- FUSELER, H. W., SHAY, J. W. & FEIT, H. (1981). The role of intermediate (10-nm) filaments in the development and integration of the myofibrillar contractile apparatus in the embryonic mammalian heart. In *Cellular and Muscle Motility*, vol. 1 (ed. R. M. Dowben & J. W. Shay), pp. 205–259. New York: Plenum Press Publ.
- GATTER, K. C., DUNNILL, M. S., VAN MUIJEN, G. N. P. & MASON, D. Y. (1986). Human lung tumours may coexpress different classes of intermediate filaments. *J. Clin. Pathol.* **39**, 950–954.
- GEISLER, N. & WEBER, K. (1981). Comparison of the proteins of two immunologically distinct intermediate-sized filaments by amino acid sequence analysis: Desmin and vimentin. *Proc. natn. Acad. Sci. U.S.A.* **78**, 4120–4123.
- GEISLER, N. & WEBER, K. (1988). Phosphorylation of desmin in vitro inhibits formation of intermediate filaments; identification of three kinase A sites in the aminoterminal head domain. *EMBO J.* **7**, 15–20.
- GODSAVE, S. F., ANDERTON, B. H., HEASMAN, J. & WYLIE, C. C. (1984). Oocytes and early embryos of *Xenopus laevis* contain intermediate filaments which react with anti-mammalian vimentin antibodies. *J. Embryol. exp. Morph.* **83**, 169–187.
- GODSAVE, S. F., ANDERTON, B. H. & WYLIE, C. C. (1986). The appearance and distribution of intermediate filament proteins during differentiation of the central nervous system, skin and notochord of *Xenopus laevis*. *J. Embryol. exp. Morph.* **97**, 201–223.
- GRANGER, B. L. & LAZARIDES, E. (1979). Desmin and vimentin coexist at the periphery of the myofibril Z disc. *Cell* **18**, 1053–1063.
- GURDON, J. B. (1987). Embryonic induction – molecular prospects. *Development* **99**, 285–306.
- GURDON, J. B., BRENNAN, S., FAIRMAN, S. & MOHUN, T. J. (1984). Transcription of muscle-specific actin genes in early *Xenopus* development: nuclear transplantation and cell dissociation. *Cell* **38**, 691–700.
- GURDON, J. B., FAIRMAN, S., MOHUN, T. J. & BRENNAN, S. (1985a). Activation of muscle-specific actin genes in *Xenopus* development by an induction between animal and vegetal cells of a blastula. *Cell* **41**, 913–922.
- GURDON, J. B. & FAIRMAN, S. (1986). Muscle gene activation by induction and the nonrequirement for cell division. *J. Embryol. exp. Morph.* **97 Supplement**, 75–84.
- GURDON, J. B., MOHUN, T. J., BRENNAN, S. & CASCIO, S. (1985b). Actin genes in *Xenopus* and their developmental control. *J. Embryol. exp. Morph.* **89 Supplement**, 125–136.
- HAYWARD, A. R. (1972). Myoid cells in the human foetal thymus. *J. Pathol.* **106**, 45–48.
- HAYWARD, L. J. & SCHWARTZ, R. J. (1986). Sequential expression of chicken actin genes during myogenesis. *J. Cell Biol.* **102**, 1485–1493.
- HENRY, K. (1968). Striated muscle in human thymus. *Lancet*, March 23, 638–639.
- HERRMANN, H., FOUQUET, B. & FRANKE, W. W. (1989). Expression of intermediate filament proteins during development of *Xenopus laevis*. I. cDNA clones encoding different forms of vimentin. *Development* **105**, 279–298.
- HUITFELDT, H. S. & BRANDTZAEG, P. (1985). Various keratin antibodies produce immunohistochemical staining of human myocardium and myometrium. *Histochem.* **83**, 381–389.
- INAGAKI, M., GONDA, Y., MATSUYAMA, M., NISHIZAWA, K., NISHI, Y. & SATO, C. (1988). Intermediate Filament Reconstitution in Vitro. The role of phosphorylation on the assembly-disassembly of desmin. *J. Biol. Chem.* **263**, 5970–5978.
- INAGAKI, M., NISHI, Y., NISHIZAWA, K., MATSUYAMA, M. & SATO, C. (1987). Site-specific phosphorylation induces disassembly of vimentin filaments in vitro. *Nature, Lond.* **328**, 649–652.
- JACKSON, B. W., GRUND, C., SCHMID, E., BÜRKI, K., FRANKE, W. W. & ILLMENSEE, K. (1980). Formation of cytoskeletal elements during mouse embryogenesis. Intermediate filaments of the cytokeratin type and desmosomes in preimplantation mouse embryos. *Differentiation* **17**, 161–179.
- JACKSON, B. W., GRUND, C., WINTER, S., FRANKE, W. W. & ILLMENSEE, K. (1981). Formation of cytoskeletal elements during mouse embryogenesis. II. Epithelial differentiation and intermediate-sized filaments in early post-implantation embryos. *Differentiation* **20**, 203–216.
- JAHN, L., FOUQUET, B. & FRANKE, W. W. (1987). Cytokeratin expression defines subtypes of endothelial and smooth muscle cells in *Xenopus laevis* and man. *Differentiation* **36**, 223–254.
- KAO, I. & DRACHMAN, D. B. (1977). Thymic muscle cells bear acetylcholine receptors: possible relation to myasthenia gravis. *Science* **195**, 74–75.
- KASPER, M., MOLL, R. & STOSIEK, P. (1988). Distribution of intermediate filaments in human umbilical cord: Unusual triple expression of cytokeratins, vimentin, and desmin. *Zool. Jb. Anat.* **117**, 227–233.
- KAY, B. K., SHAH, A. J. & HALSTEAD, W. E. (1987). Expression of



- the Ca<sup>2+</sup>-binding protein, parvalbumin, during embryonic development of the frog, *Xenopus laevis*. *J. Cell Biol.* **104**, 841–847.
- KIRCHNER, T., HOPPE, F., SCHALKE, B. & MÜLLER-HERMELINK, H. K. (1988). Microenvironment of thymic myoid cells in myasthenia gravis. *Virch. Arch. B (Cell Pathol.)* **54**, 295–302.
- KOZAK, M. (1986). Point mutations define a sequence flanking the AUG initiator codon that modulates translation by eukaryotic ribosomes. *Cell* **44**, 283–292.
- KURUC, N. & FRANKE, W. W. (1988). Transient coexpression of desmin and cytokeratin filaments in developing myocardial cells in some vertebrate species but not in others. *Differentiation* **38**, 177–193.
- LAZARIDES, E., GRANGER, B. L., GARD, D. L., O'CONNOR, C. M., BRECKLER, J., PRICE, M. & DANTO, S. I. (1982). Desmin- and vimentin-containing filaments and their role in the assembly of the Z disk in muscle cells. *Cold Spring Harbor Symp. quant. Biol.* **46**, 351–378.
- LAZARIDES, E. & HUBBARD, B. D. (1976). Immunological characterization of the subunit of the 100 Å filaments from muscle cells. *Proc. natn. Acad. Sci. U.S.A.* **73**, 4344–4348.
- LEADER, M., COLLINS, M., PATEL, J. & HENRY, K. (1987). Desmin: its value as marker of muscle derived tumours using a commercial antibody. *Virchows Arch.* **A 411**, 345–349.
- LEONARD, D. G. B., GORHAM, H. D., COLE, P., GREENE, L. A. & ZIFF, E. B. (1988). A nerve growth factor-regulated messenger RNA encodes a new intermediate filament protein. *J. Cell Biol.* **106**, 181–193.
- LONGO, F. J., KROHNE, G. & FRANKE, W. W. (1987). Basic proteins of the perinuclear theca of mammalian spermatozoa and spermatids: A novel class of cytoskeletal elements. *J. Cell Biol.* **105**, 1105–1120.
- MAHDAVI, V., STREHLER, E. E., PERIASAMY, M., WIECZOREK, D., IZUMO, S., GRIND, S., STREHLER, M. A. & NADAL-GINARD, B. (1986). Sarcomeric myosin heavy chain gene family: organization and pattern of expression. In *Molecular Biology of Muscle Development* (ed. C. Emerson, D. Fischman, B. Nadal-Ginard & M. A. Q. Siddiqui), pp. 345–361. New York: Alan R. Liss.
- MIYAZAKI, A., YOKOI, Y., MATSUZAKI, K. & KURODA, H. (1986). Immunological cross-species reactivity of desmin in fat-storing cells (Ito cells) of vertebrates. *Acta Histochem. Cytochem.* **19**, 219–229.
- MOHUN, T. J., BRENNAN, S., DATHAN, N., FAIRMAN, S. & GURDON, J. B. (1984). Cell type-specific activation of actin genes in the early amphibian embryo. *Nature, Lond.* **311**, 716–721.
- MOHUN, T. J. & GARRETT, N. (1987). An amphibian cytoskeletal-type actin gene is expressed exclusively in muscle tissue. *Development* **101**, 393–402.
- NORTON, A. J., THOMAS, J. A. & ISAACSON, O. G. (1987). Cytokeratin-specific monoclonal antibodies are reactive with tumours of smooth muscle derivation. An immunocytochemical and biochemical study using antibodies to intermediate filament cytoskeletal proteins. *Histopathology* **11**, 487–499.
- OSBORN, M., GEISLER, N., SHAW, G., SHARP, G. & WEBER, K. (1982). Intermediate Filaments. *Cold Spring Harbor Symp. quant. Biol.* **46**, 413–429.
- OSBORN, M. & WEBER, K. (1983). Tumor diagnosis by intermediate filaments typing: A novel tool for surgical pathology. *Lab. Invest.* **48**, 372–394.
- PORTIER, M. M., DE NECHAUD, B. & GROS, F. (1984). Peripherin, a new member of the intermediate protein family. *Dev. Neurosci.* **6**, 335–344.
- QUAX, W., VAN DEN BROEK, L., VREE EGBERTS, W., RAMAEKERS, F. & BLOEMENDAL, G. (1985). Characterization of the hamster desmin gene: expression and formation of desmin filaments in nonmuscle cells after gene transfer. *Cell* **43**, 327–338.
- QUAX, W., VAN DEN HEUVEL, T., VREE EGBERTS, W., QUAX-JEUKEN, Y. & BLOEMENDAL, H. (1984). Intermediate filament cDNAs from BHK-21 cells: Demonstration of distinct genes from desmin and vimentin in all vertebrate classes. *Proc. natn. Acad. Sci. U.S.A.* **81**, 5970–5974.
- QUAX, W., VREE EGBERTS, W., HENDRIKS, L. W., QUAX-JEUKEN, Y. & BLOEMENDAL, H. (1983). The structure of the vimentin gene. *Cell* **35**, 215–223.
- QUINLAN, R. A. & FRANKE, W. W. (1982). Heteropolymer filaments of vimentin and desmin in vascular smooth muscle tissue and cultured baby hamster kidney cells demonstrated by chemical crosslinking. *Proc. natn. Acad. Sci. U.S.A.* **79**, 3452–3456.
- ROBERT, B., BARTON, P., ALONSO, S., COHEN, A., DAUBAS, P., GARNER, I., WEYDERT, A. & BUCKINGHAM, M. (1986). The structure and organisation of actin and myosin genes and their expression in mouse striated muscle. In *Molecular Biology of Muscle Development* (ed. C. Emerson, D. Fischman, B. Nadal-Ginard, M. A. Q. Siddiqui), pp. 487–506. New York: Alan R. Liss.
- SMALL, J. V. & SOBIESZEK, A. (1977). Studies on the function and composition of the 10 nm (100 Å) filaments of vertebrate smooth muscle. *J. Cell Sci.* **23**, 243–268.
- STAMENKOVIC, I., SKALLI, O. & GABBIANI, G. (1986). Distribution of intermediate filament proteins in normal and diseased human glomeruli. *Am. J. Pathol.* **125**, 465–475.
- STEINERT, P. M., IDLER, W. W., CABRAL, G., GOTTESMAN, M. M. & GOLDMAN, R. D. (1981). In vitro assembly of homopolymer and copolymer filaments from intermediate filament subunits of muscle and fibroblastic cells. *Proc. natn. Acad. Sci. U.S.A.* **78**, 3692–3697.
- STURGESS, E. A., BALLATINE, J. E. M., WOODLAND, H. R., MOHUN, P. R., LANE, C. D. & DIMITRIADIS, G. J. (1980). Actin synthesis during the early development of *Xenopus laevis*. *J. Embryol. exp. Morph.* **58**, 303–320.
- TAPSCOTT, S. J., BENNETT, G. S., TOYAMA, Y., KLEINBART, F. & HOLTZER, H. (1981). Intermediate filament proteins in the developing chick spinal cord. *Dev. Biol.* **86**, 40–54.
- TOCCANIER-PELTE, M. F., SKALLI, O., KAPANGI, Y. & GABBIANI, G. (1987). Characterization of stromal cells with myoid features in lymph nodes and spleen in normal and pathologic conditions. *Am. J. Path.* **129**, 109–118.
- VAN MUIJEN, G. N. P., RUITER, D. J. & WARNAAR, S. O. (1987). Coexpression of intermediate filament polypeptides in human fetal and adult tissues. *Lab. Invest.* **57**, 359–369.
- VIRTANEN, I., KALLAJOKI, M., NÄRVÄNEN, O., PARANKO, J., THORNELL, L. E., MIETTINEN, M. & LEHTO, V. P. (1986). Peritubular myoid cells of human and rat testis are smooth muscle cells that contain desmin-type intermediate filaments. *Anat. Record* **215**, 10–20.
- WEBER, K. & GEISLER, N. (1984). Intermediate filaments – from wool  $\alpha$ -keratin to neurofilaments: a structural overview. In *Cancer Cells I, The Transformed Phenotype*, pp. 153–159. Cold Spring Harbor Laboratory.
- WEKERLE, H., PATERSON, B., KETELSEN, U. P. & FELMAN, M. (1975). Striated muscle fibres differentiate in monolayer cultures of adult thymus reticulum. *Nature, Lond.* **256**, 493–494.
- WHALEN, R. G., SELL, S. M., ERIKSSON, A. & THORNELL, L. E. (1982). Myosin subunit types in skeletal and cardiac tissues and their developmental distribution. *Dev. Biol.* **91**, 478–484.
- WILSON, C., CROSS, G. S. & WOODLAND, H. R. (1986). Tissue-specific expression of actin genes injected into *Xenopus* embryos. *Cell* **47**, 589–599.
- WYLIE, C. C., HEASMAN, J., PARKE, J. M., ANDERTON, B. & TANG, P. (1986). Cytoskeletal changes during oogenesis and early development of *Xenopus laevis*. *J. Cell Sci. Suppl.* **5**, 329–341.
